# Supplementary material for: Children’s epilepsy specialist nurse: An economic evaluation
Source: Research Square preprint supplement (doi:10.21203/rs.3.rs-6843116/v1), 2025-06-25
Supplement: Supplementary file 2 [file 058b3f423bdc8e70455488cd.docx]

**S2 Table.** Cost schedule

| **Resource use category** | **Unit cost (£)** | **Source** |
| --- | --- | --- |
| **Intervention** |  |  |
| *Face-to-face visit* | 60.83 per visit/contact | 2023 PSSRU Annual and unit costs for hospital-based nurses (Band 6 - Cost per hour including qualifications) [21] |
| *Telephone call* | 60.83 per 60 minutes call | 2023 PSSRU Annual and unit costs for hospital-based nurses (Band 6 - Cost per hour including qualifications) [21] |
| *Text message* | 5.069 per text | 2023 PSSRU Annual and unit costs for hospital-based nurses (Band 6 - Cost per hour including qualifications) [21] |
| *ECP* | 60.83 per ECP | 2023 PSSRU Annual and unit costs for hospital-based nurses (Band 6 - Cost per hour including qualifications) [21] |
| *Travel distance (in miles)* | 0.45 per mile | 2023/2024 HMRC mileage rate per mile [25] |
| *Travel time* | 60.83 per 60 minutes call | 2023 PSSRU Annual and unit costs for hospital-based nurses (Band 6 - Cost per hour including qualifications) [21] |
| **Healthcare Services** |  |  |
| *Daycare* | 333.86 | 2019 PSSRU - Unit Costs of Health and Social Care, National Schedule of NHS costs for children's health services (Daycare for Child and Adolescent Mental Health Services, Average Cost Per Patient Contact) [26] |
| *Primary care doctor* | 58.73 | 2023 PSSRU - Unit Costs of Health and Social Care, Community-based health care staff (GP: Per surgery consultation) [21] |
| *Primary care nurse* | 159.40 | 2021/2022 National Schedule of NHS costs (N12: Nursing Services for Children) [26] |
| *Physiotherapist* | 148.17 | 2021/2022 National Schedule of NHS costs (A08C1: Physiotherapist, Child, One to One) [26] |
| *Social worker* | 36.71 | 2023 PSSRU - Unit Costs of Health and Social Care, Social work assistant unit cost (Costs and unit estimations for a social work assistant - Per hour without qualifications) [21] |
| *A&E* | The unit cost depends on the year the CYP attended A&E.  A&E visit for 2021/22 = £185.69  A&E visit for 2022/23 = £176.20  A&E visit for 2023/24 = £180.00 | National Tariff - VB08Z (Emergency Medicine, Category 2 Investigation with Category 1 Treatment) [28] |
| *Outpatient* | The unit cost depends on the year the CYP made outpatient visit and the main speciality of the healthcare professional.   | Main  Specialty | 2021/22 outpatient visits | 2022/23 outpatient visits | 2023/24  outpatient visits | | --- | --- | --- | --- | | Paediatrics | 248.08 | 243.32 | 247 | | Dermatology | 147.05 | 140.54 | 143 | | Ophthalmology | 156.03 | 148.93 | 151 | | Trauma & Orthopaedics | 189.71 | 177.25 | 180 | | Paediatrics (Cardiology) | 231.24 | 223.9 | 227 | | ENT | 142.56 | 139.49 | 142 | | Gastroenterology | 239.09 | 225.49 | 229 | | General Surgery | 203.17 | 189.83 | 193 | | Respiratory Medicin | 252.57 | 235.98 | 240 | | Urology | 162.76 | 152.08 | 154 | | Endocrinology | 276.14 | 258.0 | 262 | | National Tariff (first attendance -single professional) [28] |
| *Other outpatients = £238.66 | 2019 PSSRU - Unit Costs of Health and Social Care - unit costs for hospital services - Outpatient attendances [26] |
| *Inpatient* | The unit cost is based on   - HRG code - Admission method (elective or non-elective admission) - Date of admission   (see Table A2 for the unit cost) | National Tariff - Combined day case /ordinary elective spell or Non-elective spell [28] |
| The unit cost for observations without HRG code (this depends on the admission method and year of admission)   | Year of admission /admission method | 2021/22 | 2022/23 | 2023/24 | | --- | --- | --- | --- | | Elective | 1367.24 | 1293.17 | 1320 | | Non-Elective | 2750.20 | 2126.97 | 2172 | | National Tariff - AA26F (Muscular, Balance, Cranial or Peripheral Nerve Disorders, Epilepsy or Head Injury, with CC Score 6-8) [28] |

**Additional References**

25. Driversnote. HMRC mileage rates 2024 [Internet]. 2024 [cited 2024 Jun 11]. Available from: https://www.driversnote.co.uk/blog/hmrc-mileage-rates-2024

26. Curtis LA, Burns A. PSSRU Unit Costs of Health and Social Care 2019 [Internet]. Canterbury: Personal Social Services Research Unit; 2019. Available from: www.pssru.ac.uk

27. NHS England. 2021/22 National Cost Collection Data Publication [Internet]. 2023. Available from: https://www.england.nhs.uk/publication/2021-22-national-cost-collection-data-publication/

28. NHS England. Past national tariffs: documents and policies [Internet]. 2023 [cited 2024 May 16]. Available from: https://www.england.nhs.uk/publication/past-national-tariffs-documents-and-policies/

29. PSSRU. Unit Costs of Health and Social Care [Internet]. 2024 [cited 2024 May 16]. Available from: https://www.pssru.ac.uk/project-pages/unit-costs/
