# Supplementary material for: Children’s epilepsy specialist nurse: An economic evaluation
Source: Research Square preprint supplement (doi:10.21203/rs.3.rs-6843116/v1), 2025-06-25
Supplement: Supplementary file 3 [file 135b2ac41b6019aff3a134d5.docx]

**S4 Appendix**. Usage of CESN

Usage of the CESN intervention incurs NHS costs and is encapsulated by the contacts made between the CESN and CYP. A categorised distribution of the various methods of contact over the 22-month study timeframe is given in S4 Table 1 alongside of which is given the observed count of contacts by CYP in the last column. For example, from a total count of 117 face-to-face sessions with the CESN, the take up was just over 39% of CYPs, just over half of whom had two or more sessions. That left 93 CYP who did not experience face-to-face contact with the CESN. Virtual face-to-face sessions were less used, totalling only 43 sessions, with just under 27% of CYPs using this method of contact. Text messaging was the most frequently used method of contact, totalling 1775 messages. More than 75% of CYPs were contacted by text, with the majority receiving in excess of 10 texts.

Across all methods of contact, 65 CYP (42.5% of caseload) received in excess of 10 contacts of all types with the CESN. However, there were 23 CYP (or 15.0% of caseload) who across their length of term of exposure had yet to have had any form of contact with the CESN.

**S4 Table 1.** Distribution of CESN contact and count of contacts by CYP (N=153)

| **Number of contacts** | **Method of contact** | | | | **Total**  **N (%)** |
| --- | --- | --- | --- | --- | --- |
| **Face-to-face**  **n (%)** | **Virtual face-to-face n (%)** | **Telephone calls**  **n (%)** | **Text Messages**  **n (%)** |
| 0 | 93 (60.78) | 112 (73.20) | 47 (30.72) | 36 (23.53) | 23 (15.03) |
| 1 | 28 (18.30) | 36 (25.46) | 47 (30.72) | 7 (4.58) | 9 (5.88) |
| 2 - 4 | 29 (18.95) | 2 (1.31) | 46 (30.07) | 28 (18.30) | 25 (16.34) |
| 5 - 8 | 3 (1.96) | 0 | 10 (6.54) | 21 (13.73) | 25 (16.34) |
| 9 - 10 | 0 | 0 | 1 (0.65) | 11 (7.19) | 6 (3.92) |
| Above 10 | 0 | 0 | 2 (1.31) | 50 (32.68) | 65 (42.48) |

Note: Total number of contacts=2199 (face-to-face=117, virtual face-to-face=43, telephone calls=263, text messages=1775)
