# Supplementary material for: Children’s epilepsy specialist nurse: An economic evaluation
Source: Research Square preprint supplement (doi:10.21203/rs.3.rs-6843116/v1), 2025-06-25
Supplement: Supplementary file 4 [file 30a63e9050e3f465624ca5ad.docx]

**S3 Data dictionary**

**S3 Table 1.** HES records: Outpatient care

| **Description** | **Value** | **Value Description** |
| --- | --- | --- |
| Treatment Date | Date | The date patient received outpatient care |
| Provider organisation code | alphanumeric | Eg 7A2 = Hywel Dda University Health Board |
| Age | integer | Age in years at appointment |
| Patient sex | 1 | male |
| 2 | female |
| Consultation Method | 1 | Face to face appointment |
| 2 | Virtual clinical appointment (patient contact) |
| 3 | Virtual clinical review (non-patient contact) |
| Care professional main speciality | integer | Eg 420 = Paediatrics |
| Primary procedure | alphanumeric |  |
| Secondary procedure | alphanumeric |  |

**S3 Table 2.** HES records: Admitted patient care (inpatient stays)

| **Description** | **Value** | **Value Description** |
| --- | --- | --- |
| Admission Date | Date | The date patient was admitted |
| Provider organisation code | alphanumeric | Eg 7A2 = Hywel Dda University Health Board |
| Hospital provider spell number | alphanumeric | Encrypted and unique by spell |
| Episode number | integer | 1 = first in spell, 2 = second in spell etc |
| Age | integer | Age in years at admission date rounded down |
| Patient sex | 1 | male |
| 2 | female |
| Patient classification | 1 | Inpatient ordinary admission |
| 2 | Day case admission |
| Source of admission (hospital provider spell) | 19 | usual place of residence |
| 51 | NHS other hospital provider - ward for general patients or the younger physically disabled or A&E department |
| Admission method (hospital provider spell) | 11 | Elective Admission: Waiting list |
| 21 | Emergency Admission: Accident and emergency or dental casualty department of the Health Care Provider |
| 22 | Emergency Admission: General practitioner: after a request for immediate admission has been made direct to a Hospital Provider, ie not through a Bed bureau, by a GENERAL PRACTITIONER or deputy |
| 28 | Emergency Admission: Other means |
| 81 | Other Admission: Transfer of any admitted PATIENT from other Hospital Provider other than in an emergency |
| Discharge destination | 19 | Usual place of residence |
| 51 | NHS other hospital provider |
| Discharge method | 1 | Patient discharged on clinical advice or with clinical consent |
| Episode length of stay | integer | end date(episode)-start date(episode) |
| Care professional main speciality | integer |  |
| Activity treatment function | integer |  |
| Primary diagnosis | ICD10 |  |
| Secondary diagnosis | ICD10 | Up to 98 possible codes |
| Primary procedure | OPCS4 |  |
| Secondary procedure | OPCS4 | Up to 98 possible codes |

**S3 Table 3.** HES records: Accident and emergency

| **Description** | **Value** | **Value Description** |
| --- | --- | --- |
| Administrative Arrival Date | Date | The date patient arrived at A&E |
| Provider organisation code | alphanumeric | Eg 7A2 = Hywel Dda University Health Board |
| Age | integer | Age in years at A&E |
| Patient sex | 1 | male |
| 2 | female |
| Consultation Method | 1 | Face to face appointment |
| 2 | Virtual clinical appointment (patient contact) |
| 3 | Virtual clinical review (non-patient contact) |
| Care professional main speciality | integer | Eg 420 = Paediatrics |
| Attendance group | 11 | Accident |
| 13 | Deliberate Self-Harm |
| 14 | Undetermined intent |
| 20 | Non-trauma |
| A&E Investigation | integer | Eg 1=X-ray plain film, 2=electrocardiogram etc |
| A&E Treatment | 01Z | Dressing |
| 02Z | Bandage / Support |
| 11A | Guidance/ Advice Only |
| 99A | No Treatment Required |
| 99Z | Unstated |
| Outcome of Attendance | 1 | Admitted - Same Hospital |
| 2 | Admitted - Different Hospital |
| 3 | Transferred Other LHB |
| 4 | Referred - Outpatients |
| 5 | Referred – GP |
| 6 | Referred - Other HCP |
| 7 | No Follow-Up |
| 8 | A&E Follow-Up |
| 9 | Self-Discharge |

**S3 Table 4.** Study variables

| **Variable** | **Variable Description** | **Source** |
| --- | --- | --- |
| Sex | Sex of the CYP; 0 = female, 1 = male | HDUHB CCNS - CESN |
| Patient Type | Patient type is categorised into two categories: new cases and inherited cases. New cases include CYPs diagnosed after the CESN assumed post (1 November 2021), and inherited cases include CYPs diagnosed before the CESN assumed post. | HDUHB CCNS - CESN |
| Age | For new case CYP, age is recorded on the date of diagnosis, whereas for all inherited case CYP the record date for age is the start date: 1st November 2021. | HDUHB CCNS - CESN |
| Rurality | The place of residence is classified based on the 2011 Rural-Urban Classification for Small Area Geographies: 1=large town, 2=small town and 3=village | Welsh Government website [30] |
| Travel distance | Distance covered (in miles) on return travel by the CESN from the CCNS in Glangwili General Hospital to either the CYP’s home or to the CYP’s school. | HDUHB CCNS - CESN |
| Travel time | Time spent (in minutes) on return travel by the CESN from the CCNS in Glangwili General Hospital to either the CYP’s home or to the CYP’s school. | HDUHB CCNS - CESN |
| Travel cost | The cost incurred on return travel by the CESN from the CCNS in Glangwili General Hospital to either the home or school of the CYP. It includes the distance cost and the time cost. | 2023/2024 HMRC mileage rate per mile [25] and 2023 PSSRU Annual and unit costs for hospital-based nurses (Band 6 - Cost per hour including qualifications) [21] |
| Exposure days | The number of days the CYP spends on CESN caseload, excluding any waiting time until first contact. | HDUHB CCNS - CESN |
| Waiting time | The number of days the CYP waits between referral and CESN first contact. | HDUHB CCNS - CESN |
| Clinical need | Measures the health-related support/intervention a CYP requires from the CESN. Clinical need is CESN-assessed and depends on CYP seizure frequency and severity: 1=high need, 0=low need and -1=missing. In modelling, low need and missing categories are combined. | HDUHB CCNS - CESN |
| Epilepsy Care Plan (ECP) involvement | A binary variable (1=yes, 0=no) which records the involvement of the CESN in the preparation and/or update of the ECP. They are created whenever CYPs are prescribed rescue buccal midazolam. | HDUHB CCNS - CESN |
| ECP Cost | Cost incurred via the CESN’s involvement in the preparation and/or updating of ECPs (£60.83 per ECP). | 2023 PSSRU Annual and unit costs for hospital-based nurses (Band 6 - Cost per hour including qualifications) [21] |
| 2019 IMD | Welsh 2019 IMD quartile ranking: 1=most deprived, 2=deprived, 3=less deprived and 4=least deprived | Welsh Government website [30] |
| Face-to-face contacts | Total number of physical contacts between the CESN and the CYPs | HDUHB CCNS - CESN |
| Cost from face-to-face contacts | The cost incurred from the number of physical contacts between the CESN and the CYPs (£60.83 per contact). | 2023 PSSRU Annual and unit costs for hospital-based nurses (Band 6 - Cost per hour including qualifications) [21] |
| Virtual face-to-face contacts | Total number of virtual contacts between the CESN and the CYPs | HDUHB CCNS - CESN |
| Cost from virtual face-to-face contacts | The cost incurred from the number of virtual contacts between the CESN and the CYPs (£60.83 per contact). | 2023 PSSRU Annual and unit costs for hospital-based nurses (Band 6 - Cost per hour including qualifications) [21] |
| Telephone calls | The total number of telephone calls made from the CESN’s phone to the CYP’s parents/guardians. The phone records are from 1st August 2022 to 31st July 2023. | HDUHB CCNS - CESN |
| Cost from telephone calls | Cost is based on the duration of telephone calls made from the CESN’s phone to the CYP’s parents/guardians (£60.83 per 60 minutes). The CESN takes an average of 6 minutes per call. Telephone subscription fee not included. | 2023 PSSRU Annual and unit costs for hospital-based nurses (Band 6 - Cost per hour including qualifications) [21] |
| Text messages | The total number of text messages made from the CESN’s phone to the CYP’s parents/guardians. The CESN takes an average of 5 minutes per text. | HDUHB CCNS - CESN |
| Cost from text messages | Cost is based on the number of text messages made by the CESN to the CYP’s parents/guardians (£5.07 per text taking 5 minutes on average to write). Telephone subscription fee not included. | 2023 PSSRU Annual and unit costs for hospital-based nurses (Band 6 - Cost per hour including qualifications) [21] |
| A&E visit | Total number of A&E visit by the CYP | HDUHB Information Services |
| Cost of A&E visit | The cost incurred from an A&E visit by the CYP | National Tariff - VB08Z (Emergency Medicine, Category 2 Investigation with Category 1 Treatment) [28] |
| Inpatient admission | Total number of inpatient stays by the CYP | HDUHB Information Services |
| Cost of inpatient admission | The cost incurred from inpatient admission by the CYP | National Tariff - Combined day case /ordinary elective spell or Non-elective spell [28] and National Tariff - AA26F (Muscular, Balance, Cranial or Peripheral Nerve Disorders, Epilepsy or Head Injury, with CC Score 6-8) [28] |
| Outpatient appointment | Total number of outpatient attendances by the CYP | HDUHB Information Services |
| Cost of Outpatient appointment | The cost incurred from outpatient appointments by the CYP | National Tariff (first attendance -single professional) [28] and 2019 PSSRU - Unit Costs of Health and Social Care - unit costs for hospital services - Outpatient attendances [26] |
| Medication | Sodium valproate at maximum indicated daily dosage levels and two packs of rescue buccal midazolam pre-filled oral syringes, one for storage at home and the other at school | NICE (2022). Epilepsies in children, young people and adults: [O] Effectiveness of a nurse specialist in the management of epilepsy [16] |

**S3 Table 5.** Imputed variables

| **Variable** | **Variable Description** | **Source** |
| --- | --- | --- |
| Day Care | Estimated number of day care attendances by the CYP | NICE (2022). Epilepsies in children, young people and adults: [O] Effectiveness of a nurse specialist in the management of epilepsy [16] |
| Cost of Day Care | Cost incurred from the estimated number of day care attendance by the CYP | 2019 PSSRU - Unit Costs of Health and Social Care, National Schedule of NHS costs for children's health services (Daycare for Child and Adolescent Mental Health Services, Average Cost Per Patient Contact) [26] |
| GP doctor visit | Estimated number of GP doctor visits by the CYP | NICE (2022). Epilepsies in children, young people and adults: [O] Effectiveness of a nurse specialist in the management of epilepsy [16] |
| Cost from GP doctor visit | The cost incurred from the estimated number of GP doctor visits by the CYP | 2023 PSSRU - Unit Costs of Health and Social Care, Community-based health care staff (GP: Per surgery consultation) [21] |
| GP nurse visit | Estimated number of GP nurse visits by the CYP | NICE (2022). Epilepsies in children, young people and adults: [O] Effectiveness of a nurse specialist in the management of epilepsy [16] |
| Cost from GP nurse visit | The cost incurred from the estimated number of GP nurse visits by the CYP | 2021/2022 National Schedule of NHS costs (N12: Nursing Services for Children) [27] |
| Physiotherapist visit | Estimated number of Physiotherapist visits by the CYP | NICE (2022). Epilepsies in children, young people and adults: [O] Effectiveness of a nurse specialist in the management of epilepsy [16] |
| Cost from Physiotherapist visit | Cost incurred from the estimated number of Physiotherapist visits by the CYP | 2021/2022 National Schedule of NHS costs (A08C1: Physiotherapist, Child, One to One) [27] |
| Social Worker visit | Estimated number of social worker visits by the CYP | NICE (2022). Epilepsies in children, young people and adults: [O] Effectiveness of a nurse specialist in the management of epilepsy [16] |
| Cost from social worker visit | Cost incurred from the estimated number of social worker visits by the CYP | 2023 PSSRU - Unit Costs of Health and Social Care, Social work assistant unit cost (Costs and unit estimations for a social work assistant - Per hour without qualifications) [21] |

**Additional References**

25. Driversnote. HMRC mileage rates 2024 [Internet]. 2024 [cited 2024 Jun 11]. Available from: https://www.driversnote.co.uk/blog/hmrc-mileage-rates-2024

26. Curtis LA, Burns A. PSSRU Unit Costs of Health and Social Care 2019 [Internet]. Canterbury: Personal Social Services Research Unit; 2019. Available from: www.pssru.ac.uk

27. NHS England. 2021/22 National Cost Collection Data Publication [Internet]. 2023. Available from: https://www.england.nhs.uk/publication/2021-22-national-cost-collection-data-publication/

28. NHS England. Past national tariffs: documents and policies [Internet]. 2023 [cited 2024 May 16]. Available from: https://www.england.nhs.uk/publication/past-national-tariffs-documents-and-policies/

30. Welsh Government. Welsh Index of Multiple Deprivation (full Index update with ranks): 2019 [Internet]. 2022 [cited 2024 Sep 24]. Available from: https://www.gov.wales/welsh-index-multiple-deprivation-full-index-update-ranks-2019
