# Supplementary material for: Children’s epilepsy specialist nurse: An economic evaluation
Source: Research Square preprint supplement (doi:10.21203/rs.3.rs-6843116/v1), 2025-06-25
Supplement: Supplementary file 5 [file 3cfdd3cdcdd6b95ae6ce6933.docx]

**S1 Table.** The NHS Cost Inflation Index

| Year | NHSCII pay and prices |
| --- | --- |
| 2018/2019 | 1.60% |
| 2019/2020 | 2.14% |
| 2020/2021 | 2.49% |
| 2021/2022 | 2.57% |
| 2022/2023 | 7.03% |
| 2023/2024* | 4.88%a |

a Estimated
