# Supplementary material for: Children’s epilepsy specialist nurse: An economic evaluation
Source: Research Square preprint supplement (doi:10.21203/rs.3.rs-6843116/v1), 2025-06-25
Supplement: Supplementary file 6 [file 48d2a0ff928c4c7a01f708dd.docx]

**S5 Appendix**. Usage of healthcare services

We report on all-causes healthcare services usage across the following categories: A&E visit, inpatient admission and outpatient appointment. In contrast, the NICE economic evaluation, using results from Noble et al [17], reported patient self-declared usages provided they were epilepsy-related. An additional complication was that their data were obtained from adults. However, the committee developing guidance NG217 deemed that adult usage accurately reflects CYP usage.

The NICE economic evaluation reports usage observed in the Noble et al [17] randomised controlled trial, see their Table 19. Contact frequencies for the TAU and epilepsy nurse arms (37 adults in the TAU arm and 32 adults in the epilepsy nurse arm) were reported in two six-month blocks. We aggregate these to create 1-year counts over the 2 arms, with total exposures: TAU 37×365=13505 days and epilepsy nurse 32×365=11680 days, as the patient when admitted to the trial is, in effect, both referred to the CESN and contacted by the CESN at that point.

S5 Table 1 contrasts usage reported in the NICE evaluation with usages observed in HDUHB, the first set of results being for Baseline (HDUHB-CESN with n=153) and the second set split into two subgroups: inherited patients (n=101) and new patients (n=52). The subgroup of inherited patients is a better match to the participants included in the Noble et al [17] trial, where eligibility for the trial required participants to have been diagnosed with epilepsy for at least 1 year. Usages are converted to a common unit (pppy = per person per year) to enable comparisons.

**S5 Table 1.** Healthcare services usage

|  | **NICE-TAU** | | **NICE-epilepsy nurse** | | **HDUHB-CESN-Baseline** | | | **HDUHB-CESN-Inherited** | | | **HDUHB-CESN-New** | | |
| --- | --- | --- | --- | --- | --- | --- | --- | --- | --- | --- | --- | --- | --- |
| **Cohort size n** | 37 | | 32 | | 153 | | | 101 | | | 52 | | |
| **Total exposure (days)** | 13,505 | | 11,680 | | 56,921 | | | 41,352 | | | 15,569 | | |
| **Average exposure per CYP (yrs)** | 1 | | 1 | | 1.02 | | | 1.12 | | | 0.82 | | |
|  | Freq | pppy | Freq | pppy | Freq | Adj freq | pppy | Freq | Adj freq | pppy | Freq | Adj freq | pppy |
| A&E visit | 28 | 0.76 | 27 | 0.84 | 112 | 109.9 | 0.72 | 64 | 57.1 | 0.56 | 48 | 58.5 | 1.13 |
| Inpatient stays | 13 | 0.73 | 6 | 0.72 | 144 | 141.3 | 0.92 | 77 | 68.6 | 0.68 | 67 | 81.7 | 1.57 |
| ED short-stay ward attendance | 14 | 17 |
| Neurology outpatient visits | 45 | 1.81 | 40 | 2.16 | 627 | 615.2 | 4.02 | 426 | 379.8 | 3.76 | 201 | 245.0 | 4.71 |
| Other outpatient visits | 22 | 29 |
| Day care | 3 | 0.08 | 9 | 0.28 | 43.9 | 43.0 | 0.28 | 31.9 | 28.4 | 0.28 | 12 | 14.6 | 0.28 |
| Primary care doctor attendance | 49 | 1.32 | 48 | 1.50 | 233.9 | 229.5 | 1.50 | 169.9 | 151.5 | 1.50 | 64 | 78 | 1.50 |
| Primary care nurse attendance | 29 | 0.78 | 13 | 0.41 | 63.4 | 62.2 | 0.41 | 46.0 | 41.0 | 0.41 | 17.3 | 21.1 | 0.41 |
| Physiotherapist visits | 3 | 0.08 | 4 | 0.13 | 19.5 | 19.1 | 0.13 | 14.2 | 12.6 | 0.13 | 5.3 | 6.5 | 0.13 |
| Social worker visits | 1 | 0.03 | 9 | 0.28 | 43.9 | 43.0 | 0.28 | 31.9 | 28.4 | 0.28 | 12 | 14.6 | 0.28 |

Notes. Adjusted frequency imputes annual usage in HDUHB by apportioning, with average exposure expressed in years. Pppy estimates annual per CYP usage, dividing annual frequency (or adjusted frequency for HDUHB) by cohort size n. Due to missing data HDUHB usage for Day Care, Primary Care Doctor/Nurse attendance, Physiotherapist visit, Social worker visit assumed an exact match to NICE-epilepsy specialist nurse usages; imputed usages shaded.
