# Supplementary material for: Children’s epilepsy specialist nurse: An economic evaluation
Source: Research Square preprint supplement (doi:10.21203/rs.3.rs-6843116/v1), 2025-06-25
Supplement: Supplementary file 7 [file 6fdfbb951d6b744ee383af71.docx]

**S7 Appendix.** NICE guidance and quality standards

NICE recommendations on epilepsy specialist nursing are given in chapter 11.1 of guidance NG217 [15]. The economic evidence on which this part of NICE guidance is based is given in Chapter O of NG217 [16], where Noble et al [17] and Ring et al [18] are the economic assessments that underpin it. Prominent amongst the recommendations that NICE issued is universal access for everyone with epilepsy (see 11.1.1). With access comes a session with the epilepsy nurse providing information and care-planning (see 11.1.2), which may for young people, not children, take the form of a group session with the CESN (see 11.1.4). Finally, for CYP who continue to have seizures recommended is at least 2 epilepsy nurse sessions every year, along with follow-up after each time the CYP visits A&E (see 11.1.3).

Statement 3 of the NICE Quality Standard QS211 concerns access to epilepsy specialist nursing services for people with epilepsy [19]. Measures are suggested to assess the quality of the service provision, and it is on these that we report in S7 Table 1. Note that these do not cover 11.1.3, which is examined separately afterwards.

**S7 Table 1.** NICE Quality Statement 3: access to an epilepsy specialist nurse

| **Measure in statement** | **Notes** | **Value** | **Proportion** |
| --- | --- | --- | --- |
| (a) Proportion of CYPs receiving epilepsy care who are given the contact details of a named epilepsy specialist nurse or an epilepsy nurse team | Denominator (NICE): The number of people receiving care from an epilepsy service  Prevalent cases of CYPs with epilepsy exceed 320 in HDUHB (in mid-2021) with approximately 30 incident cases annually. We assume every CYP with epilepsy in HDUHB receives healthcare for their condition. | 320 | 0.391 |
| Numerator (NICE): The number of people in the denominator who are given the contact details of a named epilepsy specialist nurse or an epilepsy nurse team  Our data records contacting by the CESN. As at 31-Aug-2023, the CESN had contacted 125 CYP with epilepsy living in the HDUHB region. | 125 |
| (b) Proportion of CYPs with epilepsy who continue to have seizures who have had an information and care-planning sessions with an epilepsy specialist nurse at least twice within the past year | Denominator (NICE): The number of people with epilepsy who continue to have seizures  Our data records CYP with high clinical needs (n=33) and CYP sending seizure videos to the CESN (n=26; 13 of whom have high clinical needs). We assume CYP in both groups constitute those with epilepsy who continue to have seizures (n=46). Furthermore, to be consistent with the period given in (b), from the latter, we include only those CYPs who are recorded to have at least one year of exposure to the CESN (n=28). | 28 | 0.643 |
| Numerator (NICE): The number in the denominator who have had an information and care planning session with an epilepsy specialist nurse at least twice within the past year.  Our data records dates of telephone calls by the CESN but not the dates on which physical and virtual contacts with the CYP occurred. The count given here includes all CYPs in the denominator who received at least two telephone calls from the CESN in the past year. | 18 |
| (c) Proportion of CYPs diagnosed with epilepsy who received input from an epilepsy specialist nurse within the first year of care. | Denominator (NICE): The number of children and young people diagnosed with epilepsy in their first year of care  The count given is the number of new cases brought onto CESN caseload over the study timeframe (n=52). This number is justified because it is broadly consistent with the annual incident of epilepsy in HDUHB of 30 CYP. | 52 | 0.731 |
| Numerator (NICE): The number in the denominator who received input from an epilepsy specialist nurse  Our data records dates of telephone calls and text messages by the CESN but not the dates on which physical and virtual contacts with the CYP occurred. The count given here is all new case CYPs who received at least one text/telephone contact during the year-long period starting from their diagnosis date. | 38 |

Guidance is given in 11.1.3 for CYPs who continue to have seizures to be offered epilepsy specialist nurse sessions, in two circumstances: (i) at least twice a year and (ii) after A&E visits. Due to limitations in recordings of dates, we treat part (i) as equivalent to statement (b) in the table above; the measured proportion is therefore 0.643. For part(ii), there were T=55 A&E visits recorded on n=46 CYPs with epilepsy who continue to have seizures. Based only on dated telephone records, follow-up by the CESN within 10 days of the visit occurred on 13 occasions: denominator=55, numerator=13, proportion=0.236.
