# Supplementary material for: Children’s epilepsy specialist nurse: An economic evaluation
Source: Research Square preprint supplement (doi:10.21203/rs.3.rs-6843116/v1), 2025-06-25
Supplement: Supplementary file 8 [file dbc34420edd3fecadc4b2e88.docx]

**S6 Appendix**. Prioritising high clinical need

The clinical needs of the CYP are based on multiple factors such as epilepsy severity and frequency of interventions. Current practice in HDUHB sees clinical status – high/low need - assigned by the CESN on first contact with the CYP. In this analysis, the cohort we consider has size n=148, where 4 missing a needs assessment and 1 high need CYP while referred had not been contacted by the CESN have been removed from Baseline’s n=153 cohort. Details for the smaller group of n=148 CYP appear in the first row of S6 Table 1 (cf Table 7); note that the ROI is 41%.

**S6 Table 1.** Cost outcomes (2023-24 prices) and annual return on investment to HDUHB

| **Setting** | **N** | **CESN** | | | | | **Saving** | **Return on Investment to HDUHB** |
| --- | --- | --- | --- | --- | --- | --- | --- | --- |
|  |  | **Total exposure**  **(day)** | **CESN intervention**  **(£)** | **Other healthcare services**  **(£)** | **Total salary**  **(£)** | **Total cost**  **(£)** | **Difference in total costs (£)** | **Annual (%)**  **(95%CI)** |
| **Baseline**  **subgroup** | 148 | 55,094 | 31,789 | 491,196 | 166,250 | 658,239 | 145,897 | 41.01  (11.33-66.22) |
| **Scenario 4:**  **Prioritisation** | 148 | 54,763 | 27,293 | 447,198 | 166,250 | 614,241 | 185,069 | 50.40  (22.96-77.85) |

In S6 Table 2, observed counts and costs of clinical need are given factored by whether the CYP did, or did not wait on caseload for at least one day before first contact was made. The new classification of cost (wait and under-care) seen in the table maps to the cost structure set up in subsection CESN intervention and subsection Healthcare services as follows: waiting costs include only healthcare services costs, and under-care costs include both CESN intervention costs in full and healthcare services in part. Observe that for high need CYP, the per person daily waiting cost averages £1.10 (=£20,382/(16x1162)), whereas for low need CYP the corresponding average is considerably smaller, £0.09 (=£86,757/(87x11433)). Also, comparing the per person average daily cost after exposure to CESN care for high clinical need CYP, this is £0.84 (=£87532/(16x6498)) if CYP had been subject to waiting for care, versus £0.57 (=£63,880/(16x7013)) when waiting was avoided.

**S6 Table 2.** Observed aggregates: counts and costs by clinical need factored by wait

|  |  | **n** | **Total wait (day)** | **Cost while waiting (£)** | **Exposure**  **(day)** | **Cost after exposure (£)** | **Total of costs (£)** |
| --- | --- | --- | --- | --- | --- | --- | --- |
| **High need** | Waited | 16 | 1162 | 20382 | 6498 | 87532 | 107914 |
| Not Waited | 16 | 0 | 0 | 7013 | 63880 | 63880 |
| **Combined** | 32 | 1162 | 20382 | 13511 | 151412 | 171794 |
| **Low need** | Waited | 87 | 11433 | 86757 | 30553 | 173291 | 260048 |
| Not Waited | 29 | 0 | 0 | 11030 | 91143 | 91143 |
| **Combined** | 116 | 11433 | 86757 | 41583 | 264434 | 351191 |
| **Total** | | 148 | 12595 | 107139 | 55094 | 415846 | 522985 |

Assuming better financial outcomes reflect improved health outcomes, these results suggest that improvement occurs the greater is the exposure of a high need CYP to the care of the CESN and, secondly, the degree of that improvement is greater for the high need CYP relative to that for a low need CYP. In other words, giving priority access to CESN care to CYP with high clinical needs may improve health outcomes.

We consider a prioritisation policy in which: (i) the CESN receives the status of CYP clinical need as part of the package of referral information, then (ii) the CESN immediately actions contact to any CYP identified to have high clinical need. Prioritisation prevents any high need CYP from having to wait for first contact. However, in promoting care for high need CYP, we assume this counterbalances in equal measure against loss of care for low need CYP all of whom must now experience a period of waiting for contact from the CESN.

We consider the financial implications of prioritisation, imputing counts and costs in proportion to group size, these are given in S6 Table 3. Comparing the grand totals for waiting and under-care costs seen in S6 Tables 2 and 3, the prioritisation policy is cost-saving.

**S6 Table 3.** Prioritisation: imputed aggregates of counts and costs by clinical need

|  | **n** | **Total wait (day)** | **Cost while waiting (£)** | **Exposure**  **(day)** | **Cost after exposure (£)** | **Total of costs (£)** |
| --- | --- | --- | --- | --- | --- | --- |
| **High need** | 32 | 0 | 0 | 140261 | 1277602 | 127760 |
| **Low need** | 116 | 152443 | 1156764 | 407375 | 2310556 | 346731 |
| **Total** | 148 | 15244 | 115676 | 54763 | 358815 | 474491 |

**Imputations:**

1 7013+7013

2 £63880+£63880

3 11433+(29/87)x11433

4 £86757+(29/87)x£86757

5 30553+(29/87)x30553

6 £173291+(29/87)x£173291

In terms of ROI, results for the prioritisation policy are given in the second row of S6 Table 1. The level of ROI is estimated to increase by almost 10 percentage points when CYP with high clinical need are identified earlier and given priority contact.
